# Supplementary material for: Exploring the Free Energy Landscape: From Dynamics to Networks and Back
Source: PLOS journal article supplement (doi:10.1371/journal.pcbi.1000415), 2009-06-25
Supplement: S3 (10.1371/journal.pcbi.1000415.s003) [file journal.pcbi.1000415.s003]

Archive with 1 entries (1 files):
- TextS3_figs.pdf
