# Supplementary material for: Exploring the Free Energy Landscape: From Dynamics to Networks and Back
Source: PLOS journal article supplement (doi:10.1371/journal.pcbi.1000415), 2009-06-25
Supplement: S3 (10.1371/journal.pcbi.1000415.s003) [file journal.pcbi.1000415.s003 › TextS3_figs.pdf]

# Alanine dipeptide

## Molecular dynamics simulation

The terminally blocked alanine peptide Ace-Ala-Nme has been modeled by the OPLS force field [1] with the program Gromacs 3.3.1 [2] and solvated with TIP4P waters [3]. A Langevin MD simulation has been performed at 400K with a friction coefficient of  $5 \text{ ps}^{-1}$ . In order to set up the CMN, a single trajectory of 250 ns has been analyzed with conformations saved every 0.01 ps (5 MD steps).

## Direct inter-basins transitions

An extension of Table 2 of main text is shown in Table S2 with the whole data for the direct transitions.

**Table S2. Characteristic times for direct transition inter-basins.**

| $a \rightarrow b$              | $1/k_{ba}$ (ps) |                                |         |
|--------------------------------|-----------------|--------------------------------|---------|
| $C_{7eq} \rightarrow C_5$      | 0.66            | $\alpha' \rightarrow C_5$      | 1.35    |
| $C_{7eq} \rightarrow \alpha_R$ | 3.32            | $\alpha' \rightarrow C_{7eq}$  | 3.48    |
| $C_{7eq} \rightarrow \alpha'$  | 10.80           | $\alpha' \rightarrow \alpha_R$ | 0.30    |
| $C_{7eq} \rightarrow \alpha_L$ | 1968.34         | $\alpha' \rightarrow \alpha_L$ | 400.57  |
| $C_5 \rightarrow C_{7eq}$      | 0.33            | $C_{7ax} \rightarrow C_5$      | 6.63    |
| $C_5 \rightarrow \alpha_R$     | 98.25           | $C_{7ax} \rightarrow \alpha_R$ | 815.87  |
| $C_5 \rightarrow \alpha'$      | 2.11            | $C_{7ax} \rightarrow \alpha_L$ | 0.78    |
| $C_5 \rightarrow C_{7ax}$      | 393.75          | $\alpha_L \rightarrow C_5$     | 1213.40 |
| $C_5 \rightarrow \alpha_L$     | 51187.87        | $\alpha_L \rightarrow C_{7eq}$ | 88.24   |
| $\alpha_R \rightarrow C_5$     | 110.28          | $\alpha_L \rightarrow \alpha'$ | 58.47   |
| $\alpha_R \rightarrow C_{7eq}$ | 1.88            | $\alpha_L \rightarrow C_{7ax}$ | 4.80    |
| $\alpha_R \rightarrow \alpha'$ | 0.54            |                                |         |
| $\alpha_R \rightarrow C_{7ax}$ | 58011.74        |                                |         |

## References

1. Jorgensen WL, Maxwell DS, Tirado-Rives J (1996) Development and testing of the opls all-atom force field on conformational energetics and properties of organic liquids. J Am Chem Soc 118: 11225–11236.
2. Van Der Spoel D, Lindahl E, Hess B, Groenhof G, Mark AE, et al. (2005) Gromacs: fast, flexible, and free. J Comput Chem 26: 1701–1718.
3. Jorgensen WL, Chandrasekhar J, Madura JD, Impey RW, Klein ML (1983) Comparison of simple potential functions for simulating liquid water. J Chem Phys 79: 926–935.
